# Supplementary material
Source: PubMed Central journal article supplement (PMC5915361)
Supplement: NIHMS956441-supplement-Supp_info_01.pdf [file NIHMS956441-supplement-Supp_info_01.pdf]

**Supplement Table 1. Birth defects covered in the Other Co-occurring Defects Category by State-based Surveillance Program**

|                                                             | Arizona   | Arkansas  | Delaware  | Florida   | Georgia*  | Illinois  | Indiana   | Iowa      | Kansas    | Kentucky  | Louisiana | Massachusetts | Minnesota | Mississippi |
|-------------------------------------------------------------|-----------|-----------|-----------|-----------|-----------|-----------|-----------|-----------|-----------|-----------|-----------|---------------|-----------|-------------|
| Years reported                                              | 2010-2013 | 2010-2013 | 2010-2014 | 2010-2014 | 2010-2014 | 2010-2014 | 2010-2014 | 2010-2014 | 2010-2014 | 2010-2014 | 2010-2014 | 2010-2014     | 2010-2014 | 2010-2014   |
| <b>Central Nervous System</b>                               |           |           |           |           |           |           |           |           |           |           |           |               |           |             |
| Anencephalus                                                | X         | X         | X         | X         | X         | X         | X         | X         | X         | X         | X         | X             | X         | X           |
| Encephalocele                                               | X         | X         | X         | X         | X         | X         | X         | X         | X         | X         | X         | X             | X         | X           |
| Holoprosencephaly                                           | 2012-2013 | X         | X         | X         | X         | X         | X         | X         | X         | X         | X         | X             | X         | X           |
| Spina bifida without anencephalus                           | X         | X         | X         | X         | X         | X         | X         | X         | X         | X         | X         | X             | X         | X           |
| <b>Eye</b>                                                  |           |           |           |           |           |           |           |           |           |           |           |               |           |             |
| Anophthalmia / microphthalmia                               | X         | X         | X         | X         | X         | X         | X         | X         | X         | X         | X         | X             | X         | X           |
| Congenital cataract                                         | X         | X         | X         | X         | X         | X         | X         | X         | X         | X         | X         | X             | X         | X           |
| <b>Ear</b>                                                  |           |           |           |           |           |           |           |           |           |           |           |               |           |             |
| Anotia/microtia                                             | X         | X         | X         | X         | X         | X         | X         | X         | X         | X         | X         | X             | X         | X           |
| <b>Cardiovascular</b>                                       |           |           |           |           |           |           |           |           |           |           |           |               |           |             |
| Aortic valve stenosis                                       | X         | X         | X         | X         | X         | X         | X         | X         | X         | X         | X         | X             | X         | X           |
| Atrial septal defect                                        |           | X         | X         | X         | X         | X         | X         | X         | X         | X         | X         | X             | X         | X           |
| Atrioventricular septal defect (Endocardial cushion defect) | 2012-2013 | X         | X         | X         | X         | X         | X         | X         | X         | X         | X         | X             | X         | X           |
| Coarctation of the aorta                                    | X         | X         | X         | X         | X         | X         | X         | X         | X         | X         | X         | X             | X         | X           |
| Common truncus (truncus arteriosus)                         | X         | X         | X         | X         | X         | X         | X         | X         | X         | X         | X         | X             | X         | X           |
| Dextro-transposition of great arteries (d-TGA)              | X         | X         | X         | X         | X         | X         | X         | X         | X         | X         | X         | X             | X         | X           |
| Double outlet right ventricle                               | 2012-2013 | X         | X         | X         | X         | X         | X         | X         | X         | X         | X         | X             | X         | X           |
| Ebstein anomaly                                             | X         | X         | X         | X         | X         | X         | X         | X         | X         | X         | X         | X             | X         | X           |
| Hypoplastic left heart syndrome                             | X         | X         | X         | X         | X         | X         | X         | X         | X         | X         | X         | X             | X         | X           |
| Interrupted aortic arch                                     | 2012-2013 | X         | 2013-2014 | X         | X         | X         | X         | X         | X         | X         | X         | X             | X         | X           |
| Pulmonary valve atresia and stenosis                        | X         | X         | X         | X         | X         | X         | X         | X         | X         | X         | X         | X             | X         | X           |
| Pulmonary valve atresia                                     |           | X         | X         | X         | X         | X         | X         | X         |           | X         | X         | X             | X         | X           |
| Single ventricle                                            | X         | X         | X         | X         | X         | X         | X         | X         | X         | X         | X         | X             | X         | X           |
| Tetralogy of Fallot                                         | X         | X         | X         | X         | X         | X         | X         | X         | X         | X         | X         | X             | X         | X           |
| Total anomalous pulmonary venous connection                 | X         | X         | X         | X         | X         | X         | X         | X         | X         | X         | X         |               | 2013-2014 | X           |
| Transposition of the great arteries (TGA)                   | X         | X         | X         | X         | X         | X         | X         | X         | X         | X         | X         | X             | X         | X           |
| Tricuspid valve atresia and stenosis                        | X         | X         | X         | X         | X         | X         | X         | X         | X         | X         | X         | X             | X         | X           |
| Tricuspid valve atresia                                     |           | X         | X         | X         | X         | X         | X         | X         | X         | X         | X         | X             | X         | X           |
| Ventricular septal defect                                   |           | X         | X         | X         | X         | X         | X         | X         | X         | X         | X         | X             | X         | X           |
| <b>Orofacial</b>                                            |           |           |           |           |           |           |           |           |           |           |           |               |           |             |
| Choanal atresia                                             | X         | X         | X         | X         | X         | X         | X         | X         | X         | X         | X         | X             | X         | X           |
| Cleft lip alone                                             | X         | X         | X         | X         | X         | X         | X         | X         | X         | X         | X         | X             | X         | X           |
| Cleft lip with cleft palate                                 | X         | X         | X         | X         | X         | X         | X         | X         | X         | X         | X         | X             | X         | X           |
| Cleft palate alone                                          | X         | X         | X         | X         | X         | X         | X         | X         | X         | X         | X         | X             | X         | X           |
| <b>Genitourinary</b>                                        |           |           |           |           |           |           |           |           |           |           |           |               |           |             |
| Bladder exstrophy                                           | X         | X         | X         | X         | X         | X         | X         | X         | X         | X         | X         | X             | X         | X           |
| Cloacal exstrophy                                           |           | X         | X         | X         | X         | X         | X         | X         | X         |           | X         | X             |           | X           |
| Congenital posterior urethral valves                        |           | X         | X         | X         | X         | X         | X         | X         | X         | X         | X         | X             | X         | X           |
| Hypospadias                                                 |           | X         | X         | X         | X         | X         | X         | X         | X         | X         | X         | X             | X         | X           |
| Renal agenesis / hypoplasia                                 |           | X         | X         | X         | X         | X         | X         | X         | X         | X         | X         | X             | X         | X           |
| <b>Musculoskeletal</b>                                      |           |           |           |           |           |           |           |           |           |           |           |               |           |             |
| Clubfoot                                                    |           | X         | X         | X         | X         | X         | X         | X         | X         | X         | X         | X             |           | X           |
| Craniosynostosis                                            |           | X         | X         | X         | X         | X         | X         | X         | X         |           | X         | X             |           |             |
| Diaphragmatic hernia                                        | X         | X         | X         | X         | X         | X         | X         | X         | X         | X         | X         | X             | X         | X           |
| Gastroschisis                                               | X         | X         | X         | X         | X         | X         | X         | X         | X         | X         | X         | X             | X         |             |
| Limb deficiencies (reduction defects)                       | X         | X         | X         | X         | X         | X         | X         | X         | X         | X         | X         | X             | X         | X           |
| Omphalocele                                                 | X         | X         | X         | X         | X         | X         | X         | X         | X         | X         | X         | X             | X         |             |
| <b>Chromosomal</b>                                          |           |           |           |           |           |           |           |           |           |           |           |               |           |             |
| Deletion 22q11.2                                            |           | X         | X         | X         | X         | X         | X         | X         | X         | X         | X         | X             |           | X           |
| Trisomy 13                                                  | X         | X         | X         | X         | X         | X         | X         | X         | X         | X         | X         | X             | X         | X           |
| Trisomy 18                                                  | X         | X         | X         | X         | X         | X         | X         | X         | X         | X         | X         | X             | X         | X           |
| Trisomy 21 (Down syndrome)                                  | X         | X         | X         | X         | X         | X         | X         | X         | X         | X         | X         | X             | X         | X           |
| Turner syndrome                                             |           | X         | X         | X         | X         | X         | X         | X         | X         | X         | X         | X             |           | X           |

An 'X' indicates that the years reported for that defect are the same as the total years reported for that state.

\*Georgia data are submitted by the Metropolitan Atlanta Congenital Defects Program.

**Supplement Table 1. Birth defects covered in the Other Co-occurring Defects Category by State-based Surveillance Program (Continues)**

|                                                             | Missouri  | Nebraska  | Nevada    | New Jersey | New York  | Oklahoma  | Oregon    | Rhode Island | South Carolina | Tennessee | Texas     | Vermont   | West Virginia | Wisconsin |
|-------------------------------------------------------------|-----------|-----------|-----------|------------|-----------|-----------|-----------|--------------|----------------|-----------|-----------|-----------|---------------|-----------|
| Years reported                                              | 2010-2014 | 2010-2014 | 2010-2014 | 2010-2014  | 2010-2014 | 2010-2014 | 2010-2014 | 2010-2014    | 2010-2014      | 2010-2014 | 2010-2014 | 2010-2014 | 2010-2014     | 2010-2014 |
| <b>Central Nervous System</b>                               |           |           |           |            |           |           |           |              |                |           |           |           |               |           |
| Anencephalus                                                | X         | X         | X         | X          | X         | X         | X         | X            | X              | X         | X         | X         | X             | X         |
| Encephalocele                                               | X         | X         | X         | X          | X         | X         | X         | X            | X              | X         | X         | X         | X             | X         |
| Holoprosencephaly                                           | X         | X         | X         | X          | X         | X         | X         | X            | X              | X         | X         | X         | X             | X         |
| Spina bifida without anencephalus                           | X         | X         | X         | X          | X         | X         | X         | X            | X              | X         | X         | X         | X             | X         |
| <b>Eye</b>                                                  |           |           |           |            |           |           |           |              |                |           |           |           |               |           |
| Anophthalmia / microphthalmia                               | X         | X         | X         | X          | X         | X         | X         | X            | X              | X         | X         | X         | X             | X         |
| Congenital cataract                                         | X         | X         | X         | X          | X         | X         | X         | X            | X              | X         | X         | X         | X             | X         |
| <b>Ear</b>                                                  |           |           |           |            |           |           |           |              |                |           |           |           |               |           |
| Anotia/microtia                                             | X         | X         | X         | X          | X         | X         | X         | X            | X              | X         | X         | X         | X             | X         |
| <b>Cardiovascular</b>                                       |           |           |           |            |           |           |           |              |                |           |           |           |               |           |
| Aortic valve stenosis                                       | X         | X         | X         | X          | X         | X         | X         | X            | X              | X         | X         | X         | X             | X         |
| Atrial septal defect                                        | X         | X         |           | X          | X         | X         | X         | X            | X              | X         | X         | X         | X             | X         |
| Atrioventricular septal defect (Endocardial cushion defect) | X         | X         | X         | X          | X         | X         | X         | X            | X              | X         | X         | X         | X             | X         |
| Coarctation of the aorta                                    | X         | X         | X         | X          | X         | X         | X         | X            | X              | X         | X         | X         | X             | X         |
| Common truncus (truncus arteriosus)                         | X         | X         | X         | X          | X         | X         | X         | X            | X              | X         | X         | X         | X             | X         |
| Dextro-transposition of great arteries (d-TGA)              | X         | X         | X         | X          | X         | X         | X         | X            | X              | X         | X         | X         | X             | X         |
| Double outlet right ventricle                               | X         | X         | X         | X          | X         | X         | X         | X            | X              | X         | X         | X         | X             | X         |
| Ebstein anomaly                                             | X         | X         | X         | X          | X         | X         | X         | X            | X              | X         | X         | X         | X             | X         |
| Hypoplastic left heart syndrome                             | X         | X         | X         | X          | X         | X         | X         | X            | X              | X         | X         | X         | X             | X         |
| Interrupted aortic arch                                     | X         | X         | X         | X          | X         | X         | X         | X            | 2013-2014      | X         | X         |           | X             | X         |
| Pulmonary valve atresia and stenosis                        | X         | X         | X         | X          | X         | X         | X         | X            | X              | X         | X         | X         | X             | X         |
| Pulmonary valve atresia                                     | X         | X         | X         | X          | X         | X         | X         | X            | X              | X         | X         | X         | X             | X         |
| Single ventricle                                            | X         | X         | X         | X          | X         | X         | X         | X            | 2014           | X         | X         | X         | X             | X         |
| Tetralogy of Fallot                                         | X         | X         | X         | X          | X         | X         | X         | X            | X              | X         | X         | X         | X             | X         |
| Total anomalous pulmonary venous connection                 | X         | X         | X         | X          | X         | X         | X         | X            | 2011-2014      | X         | X         |           | X             | X         |
| Transposition of the great arteries (TGA)                   | X         | X         | X         | X          | X         | X         | X         | X            | X              | X         | X         | X         | X             | X         |
| Tricuspid valve atresia and stenosis                        | X         | X         | X         | X          | X         | X         | X         | X            | X              | X         | X         | X         | X             | X         |
| Tricuspid valve atresia                                     | X         |           |           | X          | X         | X         |           | X            |                |           | X         |           |               | X         |
| Ventricular septal defect                                   | X         | X         | X         | X          | X         | X         | X         | X            | X              | X         | X         | X         | X             | X         |
| <b>Orofacial</b>                                            |           |           |           |            |           |           |           |              |                |           |           |           |               |           |
| Choanal atresia                                             | X         | X         | X         | X          | X         | X         | X         | X            | X              | X         | X         |           | X             | X         |
| Cleft lip alone                                             | X         | X         | X         | X          | X         | X         | X         | X            | X              | X         | X         | X         | X             | X         |
| Cleft lip with cleft palate                                 | X         | X         | X         | X          | X         | X         | X         | X            | X              | X         | X         | X         | X             | X         |
| Cleft palate alone                                          | X         | X         | X         | X          | X         | X         | X         | X            | X              | X         | X         | X         | X             | X         |
| <b>Genitourinary</b>                                        |           |           |           |            |           |           |           |              |                |           |           |           |               |           |
| Bladder exstrophy                                           | X         | X         | X         | X          | X         | X         | X         | X            | 2011-2012      | X         | X         | X         | X             | X         |
| Cloacal exstrophy                                           | X         | X         | X         | X          | X         | X         | X         | X            |                | X         | X         |           | X             | X         |
| Congenital posterior urethral valves                        | X         | X         | X         | X          | X         | X         | X         | X            | X              | X         | X         |           | X             | X         |
| Hypospadias                                                 | X         | X         | X         | X          | X         | X         | X         | X            | X              | X         | X         | X         | X             | X         |
| Renal agenesis / hypoplasia                                 | X         | X         | X         | X          | X         | X         | X         | X            | X              | X         | X         | X         | X             | X         |
| <b>Musculoskeletal</b>                                      |           |           |           |            |           |           |           |              |                |           |           |           |               |           |
| Clubfoot                                                    | X         | X         | X         | X          | X         | X         | X         | X            |                | X         | X         |           | X             | X         |
| Craniosynostosis                                            |           | X         | X         |            |           | X         |           | X            |                |           | X         |           | 2014          | X         |
| Diaphragmatic hernia                                        | X         | X         | X         | X          | X         | X         | X         | X            | X              | X         | X         | X         | X             | X         |
| Gastroschisis                                               | X         | X         | X         | X          | X         | X         | X         | X            | X              | X         | X         | X         | 2013-2014     | 2013-2014 |
| Limb deficiencies (reduction defects)                       | X         | X         | X         | X          | X         | X         | X         | X            | X              | X         | X         | X         | X             | X         |
| Omphalocele                                                 | X         | X         |           | X          | X         | X         | X         | X            | X              | X         | X         | X         | 2013-2014     | X         |
| <b>Chromosomal</b>                                          |           |           |           |            |           |           |           |              |                |           |           |           |               |           |
| Deletion 22q11.2                                            | X         | X         | X         | X          | X         | X         | X         | X            |                | X         | X         |           | X             | X         |
| Trisomy 13                                                  | X         | X         | X         | X          | X         | X         | X         | X            | X              | X         | X         | X         | X             | X         |
| Trisomy 18                                                  | X         | X         | X         | X          | X         | X         | X         | X            | X              | X         | X         | X         | X             | X         |
| Trisomy 21 (Down syndrome)                                  | X         | X         | X         | X          | X         | X         | X         | X            | X              | X         | X         | X         | X             | X         |
| Turner syndrome                                             | X         | X         | X         | X          | X         | X         | X         | X            |                | X         | X         |           | X             | X         |

An 'X' indicates that the years reported for that defect are the same as the total years reported for that state.
