# Supplementary material
Source: PubMed Central journal article supplement (PMC5915361)
Supplement: NIHMS956441-supplement-Supp_info_02.pdf [file NIHMS956441-supplement-Supp_info_02.pdf]

Appendix 2a. Variability of the State-based Surveillance Program\* Reported Percentage of Co-Occurring Defects by Case-Ascertainment Methodology

|                                                                                           |                | Case-finding Methodology†  |                             |                   | Figures¶ |
|-------------------------------------------------------------------------------------------|----------------|----------------------------|-----------------------------|-------------------|----------|
|                                                                                           |                | Active case-finding states | Passive case-finding states | All states        |          |
| <b>Co-occurring other defects (percent)</b>                                               |                |                            |                             |                   |          |
| Biliary atresia**                                                                         | Mean (± 2SD)   | 22.4 (0.0, 57.6)           | 26.7 (0.0, 59.5)            | 25.0 (0.0, 58.4)  |          |
|                                                                                           | P50 (P10, P90) | 18.2 (0.0, 50.0)           | 25.6 (0.0, 40.0)            | 23.4 (0.0, 50.0)  |          |
|                                                                                           | (P25, P75)     | (4.5, 33.3)                | (17.1, 36.4)                | (14.3, 36.4)      |          |
| Esophageal atresia/tracheoesophageal fistula                                              | Mean (± 2SD)   | 47.1 (19.0, 75.1)          | 52.8 (10.7, 94.8)           | 50.5 (13.5, 87.6) |          |
|                                                                                           | P50 (P10, P90) | 50.0 (26.4, 60.2)          | 56.8 (21.5, 71.8)           | 53.9 (21.5, 68.1) |          |
|                                                                                           | (P25, P75)     | (39.3, 57.4)               | (45.4, 65.5)                | (41.6, 63.1)      |          |
| Rectal and large intestinal atresia/stenosis††                                            | Mean (± 2SD)   | 44.3 (35.5, 53.1)          | 50.4 (12.5, 88.3)           | 48.1 (17.3, 78.9) |          |
|                                                                                           | P50 (P10, P90) | 45.3 (38.2, 50.1)          | 47.2 (25.0, 70.8)           | 45.5 (28.9, 70.7) |          |
|                                                                                           | (P25, P75)     | (41.0, 46.8)               | (35.9, 68.2)                | (38.8, 58.7)      |          |
| Small intestinal atresia/stenosis§§                                                       | Mean (± 2SD)   | 44.9 (16.7, 73.1)          | 50.9 (11.0, 90.7)           | 48.9 (12.7, 85.1) |          |
|                                                                                           | P50 (P10, P90) | 46.1 (25.0, 66.7)          | 53.6 (21.1, 71.3)           | 50.6 (25.0, 70.9) |          |
|                                                                                           | (P25, P75)     | (33.5, 54.2)               | (38.0, 66.7)                | (37.7, 61.7)      |          |
| <b>Co-occurring trisomies 13, 18, 21, Turner syndrome, and deletion 22q11.2 (percent)</b> |                |                            |                             |                   |          |
| Biliary atresia**                                                                         | Mean (± 2SD)   | 3.8 (0.0, 19.2)            | 4.4 (0.0, 21.0)             | 4.2 (0.0, 20.0)   |          |
|                                                                                           | P50 (P10, P90) | 0.0 (0.0, 9.1)             | 1.2 (0.0, 9.1)              | 0.0 (0.0, 9.1)    |          |
|                                                                                           | (P25, P75)     | (0.0, 6.3)                 | (0.0, 5.3)                  | (0.0, 6.3)        |          |
| Esophageal atresia/tracheoesophageal fistula                                              | Mean (± 2SD)   | 9.4 (0.7, 18.1)            | 7.3 (0.0, 18.9)             | 8.1 (0.0, 18.7)   |          |
|                                                                                           | P50 (P10, P90) | 10.2 (4.8, 14.3)           | 6.3 (0.0, 15.1)             | 8.3 (0.0, 14.7)   |          |
|                                                                                           | (P25, P75)     | (6.6, 12.8)                | (4.2, 8.6)                  | (5.0, 11.0)       |          |
| Rectal and large intestinal atresia/stenosis††                                            | Mean (± 2SD)   | 4.6 (0.6, 8.6)             | 5.9 (0.0, 13.9)             | 5.4 (0.0, 12.3)   |          |
|                                                                                           | P50 (P10, P90) | 4.8 (1.8, 7.4)             | 5.1 (1.8, 10.5)             | 4.9 (1.8, 8.3)    |          |
|                                                                                           | (P25, P75)     | (3.5, 5.2)                 | (4.3, 6.9)                  | (4.1, 6.6)        |          |
| Small intestinal atresia/stenosis§§                                                       | Mean (± 2SD)   | 19.6 (6.8, 32.4)           | 15.1 (0.0, 34.2)            | 16.6 (0.0, 34.1)  |          |
|                                                                                           | P50 (P10, P90) | 17.8 (13.3, 33.3)          | 14.3 (3.1, 30.6)            | 16.1 (3.3, 30.6)  |          |
|                                                                                           | (P25, P75)     | (15.2, 22.0)               | (10.9, 18.6)                | (12.8, 19.7)      |          |
| <b>Co-occurring trisomy 21 only (percent)</b>                                             |                |                            |                             |                   |          |
| Biliary atresia**                                                                         | Mean (± 2SD)   | 1.1 (0.0, 5.4)             | 1.1 (0.0, 5.9)              | 1.1 (0.0, 5.6)    |          |
|                                                                                           | P50 (P10, P90) | 0.0 (0.0, 4.5)             | 0.0 (0.0, 6.3)              | 0.0 (0.0, 6.3)    |          |
|                                                                                           | (P25, P75)     | (0.0, 0.8)                 | (0.0, 0.5)                  | (0.0, 0.8)        |          |
| Esophageal atresia/tracheoesophageal fistula                                              | Mean (± 2SD)   | 3.9 (0.0, 9.8)             | 3.6 (0.0, 9.6)              | 3.7 (0.0, 9.6)    |          |
|                                                                                           | P50 (P10, P90) | 3.2 (1.6, 6.9)             | 3.1 (0.0, 7.1)              | 3.1 (0.0, 7.1)    |          |
|                                                                                           | (P25, P75)     | (1.8, 5.9)                 | (2.5, 4.6)                  | (2.1, 5.2)        |          |

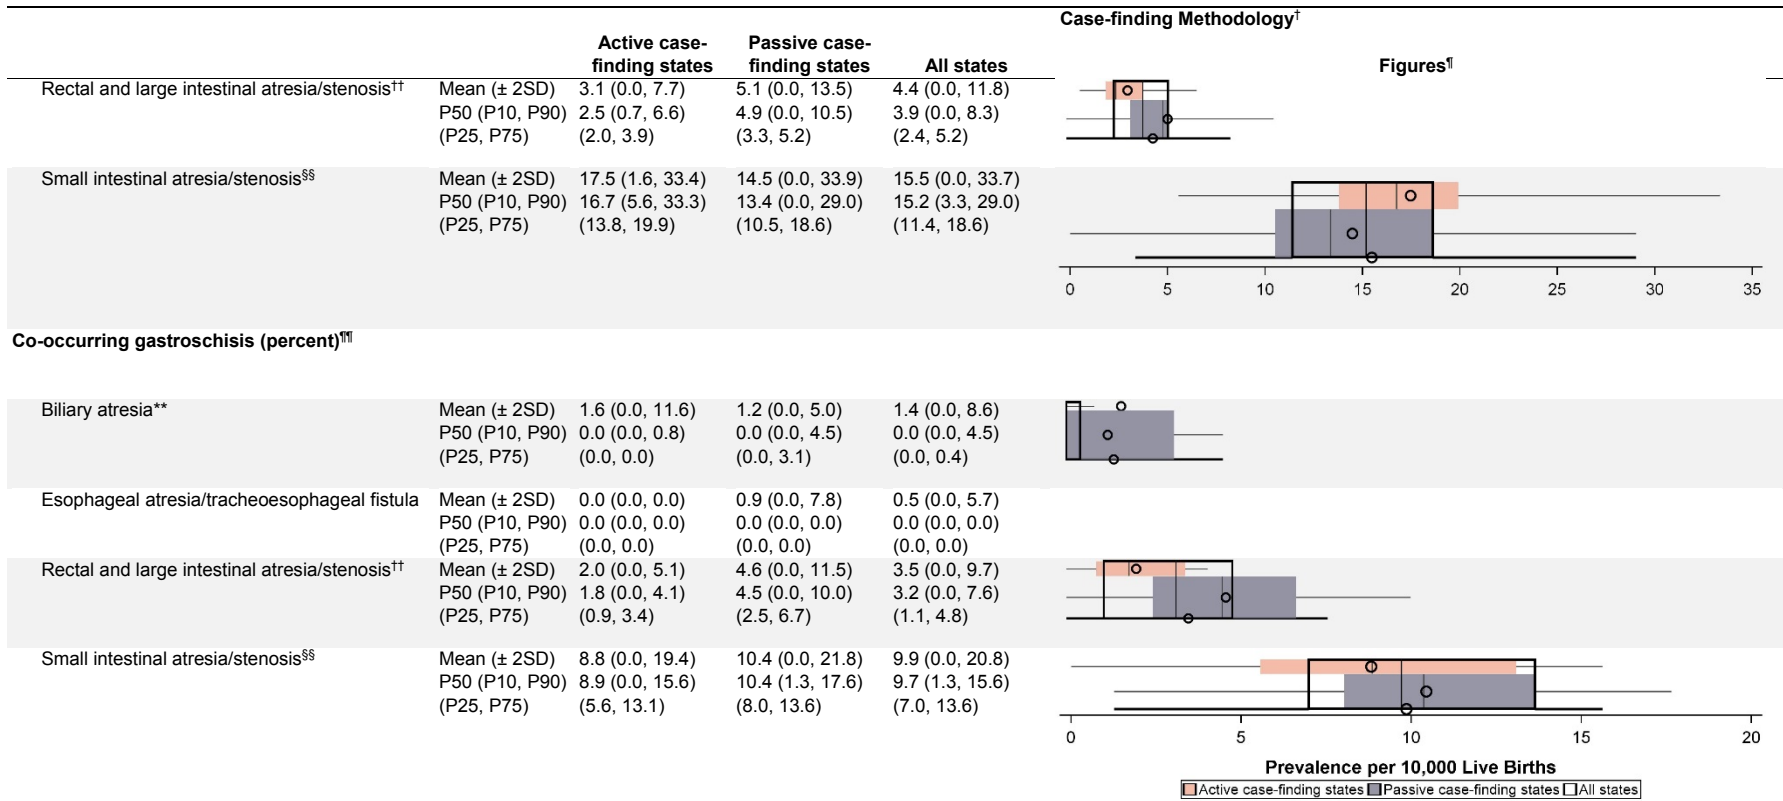

SD: Standard deviation; P10: 10<sup>th</sup> percentile; P25: 25<sup>th</sup> percentile; P50: Median; P75: 75<sup>th</sup> percentile; P90: 90<sup>th</sup> percentile

Appendix 2b. Variability of the State-based Surveillance Program\* Reported Percentage of Co-Occurring Defects by Pregnancy Outcome Inclusion

|                                                                                           |                | Pregnancy Outcome Inclusion <sup>§</sup> |                                               |                                          |                   | Figures <sup>¶</sup> |
|-------------------------------------------------------------------------------------------|----------------|------------------------------------------|-----------------------------------------------|------------------------------------------|-------------------|----------------------|
|                                                                                           |                | States that track live births only       | States that track live births and stillbirths | States that track all pregnancy outcomes | All states        |                      |
| <b>Co-occurring other defects (percent)</b>                                               |                |                                          |                                               |                                          |                   |                      |
| Biliary atresia**                                                                         | Mean (± 2SD)   | 27.3 (8.9, 45.6)                         | 25.0 (0.0, 65.9)                              | 22.3 (0.0, 58.7)                         | 25.0 (0.0, 58.4)  |                      |
|                                                                                           | P50 (P10, P90) | 26.9 (14.3, 40.0)                        | 22.5 (0.0, 50.0)                              | 23.4 (0.0, 50.0)                         | 23.4 (0.0, 50.0)  |                      |
|                                                                                           | (P25, P75)     | (20.2, 34.8)                             | (8.9, 38.2)                                   | (0.0, 33.3)                              | (14.3, 36.4)      |                      |
| Esophageal atresia/tracheoesophageal fistula                                              | Mean (± 2SD)   | 49.8 (6.3, 93.3)                         | 52.0 (10.4, 93.6)                             | 49.0 (28.0, 70.0)                        | 50.5 (13.5, 87.6) |                      |
|                                                                                           | P50 (P10, P90) | 56.3 (0.0, 68.1)                         | 55.4 (21.5, 71.8)                             | 50.0 (28.6, 60.2)                        | 53.9 (21.5, 68.1) |                      |
|                                                                                           | (P25, P75)     | (39.3, 65.5)                             | (35.9, 65.3)                                  | (43.9, 57.4)                             | (41.6, 63.1)      |                      |
| Rectal and large intestinal atresia/stenosis <sup>††</sup>                                | Mean (± 2SD)   | 48.3 (15.1, 81.5)                        | 52.4 (18.9, 86.0)                             | 41.3 (21.0, 61.5)                        | 48.1 (17.3, 78.9) |                      |
|                                                                                           | P50 (P10, P90) | 45.2 (25.0, 70.7)                        | 45.8 (35.9, 70.8)                             | 42.1 (21.1, 51.9)                        | 45.5 (28.9, 70.7) |                      |
|                                                                                           | (P25, P75)     | (38.8, 66.9)                             | (40.0, 69.8)                                  | (37.7, 48.3)                             | (38.8, 58.7)      |                      |
| Small intestinal atresia/stenosis <sup>§§</sup>                                           | Mean (± 2SD)   | 56.4 (31.2, 81.5)                        | 50.5 (13.5, 87.5)                             | 37.2 (0.0, 76.4)                         | 48.9 (12.7, 85.1) |                      |
|                                                                                           | P50 (P10, P90) | 52.4 (36.1, 70.9)                        | 54.8 (27.8, 71.3)                             | 42.7 (4.2, 57.8)                         | 50.6 (25.0, 70.9) |                      |
|                                                                                           | (P25, P75)     | (50.0, 67.9)                             | (35.7, 65.6)                                  | (25.0, 50.5)                             | (37.7, 61.7)      |                      |
| <b>Co-occurring trisomies 13, 18, 21, Turner syndrome, and deletion 22q11.2 (percent)</b> |                |                                          |                                               |                                          |                   |                      |
| Biliary atresia**                                                                         | Mean (± 2SD)   | 2.0 (0.0, 7.9)                           | 3.9 (0.0, 18.5)                               | 7.2 (0.0, 31.3)                          | 4.2 (0.0, 20.0)   |                      |
|                                                                                           | P50 (P10, P90) | 0.0 (0.0, 7.7)                           | 0.0 (0.0, 9.1)                                | 1.6 (0.0, 33.3)                          | 0.0 (0.0, 9.1)    |                      |
|                                                                                           | (P25, P75)     | (0.0, 4.0)                               | (0.0, 5.1)                                    | (0.0, 9.1)                               | (0.0, 6.3)        |                      |
| Esophageal atresia/tracheoesophageal fistula                                              | Mean (± 2SD)   | 8.3 (0.0, 18.4)                          | 7.6 (0.0, 19.9)                               | 8.8 (0.0, 18.1)                          | 8.1 (0.0, 18.7)   |                      |
|                                                                                           | P50 (P10, P90) | 8.3 (0.0, 15.1)                          | 6.9 (0.0, 11.9)                               | 10.2 (0.0, 14.7)                         | 8.3 (0.0, 14.7)   |                      |
|                                                                                           | (P25, P75)     | (5.1, 12.8)                              | (4.5, 9.1)                                    | (6.6, 11.5)                              | (5.0, 11.0)       |                      |
| Rectal and large intestinal atresia/stenosis <sup>††</sup>                                | Mean (± 2SD)   | 5.9 (0.0, 16.4)                          | 4.8 (0.5, 9.1)                                | 5.8 (1.2, 10.3)                          | 5.4 (0.0, 12.3)   |                      |
|                                                                                           | P50 (P10, P90) | 4.9 (1.6, 18.8)                          | 4.8 (3.4, 7.5)                                | 5.2 (3.5, 10.5)                          | 4.9 (1.8, 8.3)    |                      |
|                                                                                           | (P25, P75)     | (2.0, 6.9)                               | (4.1, 5.5)                                    | (4.7, 6.6)                               | (4.1, 6.6)        |                      |
| Small intestinal atresia/stenosis <sup>§§</sup>                                           | Mean (± 2SD)   | 21.9 (2.9, 41.0)                         | 14.6 (0.0, 30.8)                              | 14.0 (0.0, 29.0)                         | 16.6 (0.0, 34.1)  |                      |
|                                                                                           | P50 (P10, P90) | 18.4 (12.2, 37.5)                        | 13.9 (3.3, 22.2)                              | 15.2 (0.0, 21.9)                         | 16.1 (3.3, 30.6)  |                      |
|                                                                                           | (P25, P75)     | (16.1, 33.3)                             | (10.1, 20.6)                                  | (13.3, 18.2)                             | (12.8, 19.7)      |                      |
| <b>Co-occurring trisomy 21 only (percent)</b>                                             |                |                                          |                                               |                                          |                   |                      |
| Biliary atresia**                                                                         | Mean (± 2SD)   | 1.1 (0.0, 6.5)                           | 0.7 (0.0, 4.5)                                | 1.7 (0.0, 6.9)                           | 1.1 (0.0, 5.6)    |                      |
|                                                                                           | P50 (P10, P90) | 0.0 (0.0, 7.7)                           | 0.0 (0.0, 2.7)                                | 0.0 (0.0, 6.3)                           | 0.0 (0.0, 6.3)    |                      |
|                                                                                           | (P25, P75)     | (0.0, 0.5)                               | (0.0, 0.0)                                    | (0.0, 4.5)                               | (0.0, 0.8)        |                      |

Pregnancy Outcome Inclusion<sup>§</sup>

|                                                               |                | States that track<br>live births only | States that track<br>live births and<br>stillbirths | States that track<br>all pregnancy<br>outcomes | All states       | Figures <sup>¶</sup> |
|---------------------------------------------------------------|----------------|---------------------------------------|-----------------------------------------------------|------------------------------------------------|------------------|----------------------|
| Esophageal atresia/tracheoesophageal<br>fistula               | Mean (± 2SD)   | 3.5 (0.0, 10.0)                       | 4.3 (0.0, 10.9)                                     | 2.8 (0.0, 6.6)                                 | 3.7 (0.0, 9.6)   |                      |
|                                                               | P50 (P10, P90) | 2.8 (0.0, 10.7)                       | 3.5 (0.0, 7.1)                                      | 3.2 (0.0, 5.9)                                 | 3.1 (0.0, 7.1)   |                      |
|                                                               | (P25, P75)     | (2.5, 4.3)                            | (2.7, 6.4)                                          | (1.6, 3.8)                                     | (2.1, 5.2)       |                      |
| Rectal and large intestinal<br>atresia/stenosis <sup>††</sup> | Mean (± 2SD)   | 5.0 (0.0, 16.2)                       | 4.0 (0.0, 8.4)                                      | 4.3 (0.0, 10.1)                                | 4.4 (0.0, 11.8)  |                      |
|                                                               | P50 (P10, P90) | 4.9 (0.0, 18.8)                       | 4.3 (1.4, 5.2)                                      | 3.5 (2.0, 10.5)                                | 3.9 (0.0, 8.3)   |                      |
|                                                               | (P25, P75)     | (2.0, 5.2)                            | (3.0, 5.1)                                          | (2.4, 4.9)                                     | (2.4, 5.2)       |                      |
| Small intestinal atresia/stenosis <sup>§§</sup>               | Mean (± 2SD)   | 21.8 (2.4, 41.1)                      | 12.3 (0.0, 28.6)                                    | 13.9 (0.0, 28.9)                               | 15.5 (0.0, 33.7) |                      |
|                                                               | P50 (P10, P90) | 18.4 (11.9, 37.5)                     | 12.0 (3.3, 20.6)                                    | 15.2 (0.0, 21.9)                               | 15.2 (3.3, 29.0) |                      |
|                                                               | (P25, P75)     | (16.1, 33.3)                          | (5.6, 17.3)                                         | (13.3, 17.9)                                   | (11.4, 18.6)     |                      |

Co-occurring gastroschisis (percent)<sup>¶¶</sup>

|                                                               |                |                 |                  |                 |                 |  |
|---------------------------------------------------------------|----------------|-----------------|------------------|-----------------|-----------------|--|
| Biliary atresia <sup>**</sup>                                 | Mean (± 2SD)   | 1.3 (0.0, 5.4)  | 0.7 (0.0, 3.9)   | 2.5 (0.0, 15.0) | 1.4 (0.0, 8.6)  |  |
|                                                               | P50 (P10, P90) | 0.0 (0.0, 4.5)  | 0.0 (0.0, 3.1)   | 0.0 (0.0, 16.7) | 0.0 (0.0, 4.5)  |  |
|                                                               | (P25, P75)     | (0.0, 3.3)      | (0.0, 0.0)       | (0.0, 0.8)      | (0.0, 0.4)      |  |
| Esophageal atresia/tracheoesophageal<br>fistula               | Mean (± 2SD)   | 0.0 (0.0, 0.0)  | 1.2 (0.0, 8.9)   | 0.0 (0.0, 0.0)  | 0.5 (0.0, 5.7)  |  |
|                                                               | P50 (P10, P90) | 0.0 (0.0, 0.0)  | 0.0 (0.0, 0.0)   | 0.0 (0.0, 0.0)  | 0.0 (0.0, 0.0)  |  |
|                                                               | (P25, P75)     | (0.0, 0.0)      | (0.0, 0.0)       | (0.0, 0.0)      | (0.0, 0.0)      |  |
| Rectal and large intestinal<br>atresia/stenosis <sup>††</sup> | Mean (± 2SD)   | 2.8 (0.0, 8.2)  | 5.0 (0.0, 11.6)  | 2.2 (0.0, 7.1)  | 3.5 (0.0, 9.7)  |  |
|                                                               | P50 (P10, P90) | 2.0 (0.0, 7.6)  | 4.5 (1.3, 10.4)  | 1.3 (0.0, 6.7)  | 3.2 (0.0, 7.6)  |  |
|                                                               | (P25, P75)     | (0.0, 4.3)      | (2.9, 6.3)       | (0.0, 4.0)      | (1.1, 4.8)      |  |
| Small intestinal atresia/stenosis <sup>§§</sup>               | Mean (± 2SD)   | 7.4 (0.0, 18.6) | 11.9 (2.5, 21.3) | 8.9 (0.0, 21.0) | 9.9 (0.0, 20.8) |  |
|                                                               | P50 (P10, P90) | 8.4 (0.0, 13.6) | 11.6 (6.9, 19.0) | 8.9 (0.0, 15.6) | 9.7 (1.3, 15.6) |  |
|                                                               | (P25, P75)     | (1.3, 12.5)     | (8.0, 15.6)      | (5.0, 15.1)     | (7.0, 13.6)     |  |

Prevalence per 10,000 Live Births  
 ■ Live birth states ■ Live birth and stillbirth states ■ All pregnancy outcome states ■ All states
